# Supplementary material
Source: MDPI journal article supplement (https://www.mdpi.com/2071-1050/16/7/2861)
Supplement: s1 [file s1]

## Supplementary materials

- Abdelhafez, M. A., Ellingwood, B., & Mahmoud, H. (2021). Vulnerability of seaports to hurricanes and sea level rise in a changing climate: A case study for mobile, AL. *Coastal Engineering*, 167, 103884. <https://doi.org/10.1016/j.coastaleng.2021.103884>
- Abd-Elhamid, H. F., Zelenáková, M., Barańczuk, J., Gergelova, M. B., & Mahdi, M. (2023). *Historical Trend Analysis and Forecasting of Shoreline Change at the Nile Delta Using RS Data and GIS with the DSAS Tool*. <https://www.mdpi.com/2072-4292/15/7/1737>
- Abdrabo, M. A., & Hassaan, M. A. (2015). An integrated framework for urban resilience to climate change – Case study: Sea level rise impacts on the Nile Delta coastal urban areas. *Urban Climate*, 14, 554–565. <https://doi.org/10.1016/j.uclim.2015.09.005>
- Abou Samra, R. M., El-Gammal, M., Al-Mutairi, N., Alsahli, M. M., & Ibrahim, Mahmoud. S. (2021). GIS-based approach to estimate sea level rise impacts on Damietta coast, Egypt. *Arabian Journal of Geosciences*, 14(6), 429. <https://doi.org/10.1007/s12517-021-06810-3>
- Abuodha, P. A. O., & Woodroffe, C. D. (2010). Assessing vulnerability to sea-level rise using a coastal sensitivity index: A case study from southeast Australia. *Journal of Coastal Conservation*, 14(3), 189–205. <https://doi.org/10.1007/s11852-010-0097-0>
- Aguilera-Vidal, M., Muñoz-Perez, J. J., Contreras, A., Contreras, F., Lopez-Garcia, P., & Jigena, B. (2022). Increase in the Erosion Rate Due to the Impact of Climate Change on Sea Level Rise: Victoria Beach, a Case Study. *Journal of Marine Science and Engineering*, 10(12), Article 12. <https://doi.org/10.3390/jmse10121912>
- Akumu, C. E., Pathirana, S., Baban, S., & Bucher, D. (2011). Examining the potential impacts of sea level rise on coastal wetlands in north-eastern NSW, Australia. *Journal of Coastal Conservation*, 15(1), 15–22. <https://doi.org/10.1007/s11852-010-0114-3>
- Albedwawi, K. (2021). Assessing the impacts of sea level rise on land-use across the north-eastern parts of the UAE coastal areas using remote sensing technology. *Theses*. [https://scholarworks.uaeu.ac.ae/all\\_theses/972](https://scholarworks.uaeu.ac.ae/all_theses/972)
- Al-Buloshi, A., Al-Hatrushi, S., & Charabi, Y. (2014). GIS-based Framework for the Simulation of the Impacts of Sea Level Rise and Coastal Flooding on Oman. *Journal of Earth Science & Climatic Change*, 05(10). <https://doi.org/10.4172/2157-7617.1000238>
- Aldogom, D., Albeshier, S., Mansoori, S. A., & Nazzal, T. (2020). Assessing Coastal Land Dynamics Along UAE Shoreline Using GIS and Remote Sensing Techniques. *IOP Conference Series: Earth and Environmental Science*, 540(1), 012031. <https://doi.org/10.1088/1755-1315/540/1/012031>
- Al-Jeneid, S., Bahnassy, M., Nasr, S., & Raey, M. E. (2008). Vulnerability assessment and adaptation to the impacts of sea level rise on the Kingdom of Bahrain. *Mitigation and Adaptation Strategies for Global Change*, 13(1), 87–104. <https://doi.org/10.1007/s11027-007-9083-8>
- Alsumaiti, T. S. (2017). Mapping Changes in Mangrove Forests and the Future Impacts of Sea Level Rise in Abu Dhabi, United Arab Emirates. *International Journal of Basic and Applied Sciences*, 7(1).
- Anzidei, M., Bosman, A., Carluccio, R., Casalbone, D., D'Ajello Caracciolo, F., Esposito, A., Nicolosi, I., Pietrantonio, G., Vecchio, A., Carmisciano, C., Chiappini, M., Chiocci, F. L., Muccini, F., & Sepe, V. (2017). Flooding scenarios due to land subsidence and sea-level rise: A case study for Lipari Island (Italy). *Terra Nova*, 29(1), 44–51. <https://doi.org/10.1111/ter.12246>
- Baker, J. D., Littnan, C. L., & Johnston, D. W. (2006). Potential effects of sea level rise on the terrestrial habitats of endangered and endemic megafauna in the Northwestern Hawaiian Islands. *Endangered Species Research*, 2, 21–30. <https://doi.org/10.3354/esr002021>
- Bergillos, R. J., Rodriguez-Delgado, C., & Iglesias, G. (2019). *Wave farm impacts on coastal flooding under sea-level rise: A case study in southern Spain—ScienceDirect*. <https://www.sciencedirect.com/science/article/abs/pii/S0048969718343213>
- Bhuiyan, Md. J. A. N., & Dutta, D. (2012). Assessing impacts of sea level rise on river salinity in the Gorai river network, Bangladesh. *Estuarine, Coastal and Shelf Science*, 96, 219–227. <https://doi.org/10.1016/j.ecss.2011.11.005>
- Bitan, M., & Zviely, D. (n.d.). *Lost value assessment of bathing beaches due to sea level rise: A case study of the Mediterranean coast of Israel—ProQuest*. Retrieved September 23, 2023, from <https://www.proquest.com/docview/2113693322?accountid=62373&parentSessionId=SZMozRnWTKWMDUcpdTr3QIfS41KbomAKv5s0kG%2FMHxc%3D>
- Blum, M. D., & Roberts, H. H. (2009). Drowning of the Mississippi Delta due to insufficient sediment supply and global sea-level rise. *Nature Geoscience*, 2(7), 488–491. <https://doi.org/10.1038/ngeo553>
- Boateng, I. (2012). An assessment of the physical impacts of sea-level rise and coastal adaptation: A case study of the eastern coast of Ghana. *Climatic Change*, 114(2), 273–293. <https://doi.org/10.1007/s10584-011-0394-0>
- Boest-Petersen, A., Michalak, P., & Jokar Arsanjani, J. (2021). Impact Assessment Analysis of Sea Level Rise in Denmark: A Case Study of Falster Island, Guldborgsund. *Sustainability*, 13(13), 7503. <https://doi.org/10.3390/su13137503>
- Boori, M. S., Amaro, V. E., & Targino, A. (2012). *Coastal risk assessment and adaptation of the impact of sea-level rise, climate change and hazards: A RS and GIS based approach in Apodi- Mossoró estuary, Northeast Brazil*. 2(3).
- Bornman, T. G., Schmidt, J., Adams, J. B., Mfikili, A. N., Farre, R. E., & Smit, A. J. (2016). Relative sea-level rise and the

- potential for subsidence of the Swartkops Estuary intertidal salt marshes, South Africa. *South African Journal of Botany*, 107, 91–100. <https://doi.org/10.1016/j.sajb.2016.05.003>
- Bryan, B., Harvey, N., Belperio, T., & Bourman, B. (2001). Distributed process modeling for regional assessment of coastal vulnerability to sea-level rise. *Environmental Modeling & Assessment*, 6(1), 57–65. <https://doi.org/10.1023/A:1011515213106>
- Camuffo, D. (2022). A discussion on sea level rise, rate ad acceleration. Venice as a case study. *Environmental Earth Sciences*, 81(13). <https://doi.org/10.1007/s12665-022-10482-x>
- Chen, J. (1997). The Impact of Sea Level Rise on China's Coastal Areas and Its Disaster Hazard Evaluation. *Journal of Coastal Research*, 13(3), 925–930.
- Cheng, H. Q., Chen, J. Y., Chen, Z. J., Ruan, R. L., Xu, G. Q., Zeng, G., Zhu, J. R., Dai, Z. J., Chen, X. Y., Gu, S. H., Zhang, X. L., & Wang, H. M. (2018). Mapping Sea Level Rise Behavior in an Estuarine Delta System: A Case Study along the Shanghai Coast. *Engineering*, 4(1), 156–163. <https://doi.org/10.1016/j.eng.2018.02.002>
- Chini, N., Stansby, P., Leake, J., Wolf, J., Roberts-Jones, J., & Lowe, J. (2010). The impact of sea level rise and climate change on inshore wave climate: A case study for East Anglia (UK). *Coastal Engineering*, 57(11), 973–984. <https://doi.org/10.1016/j.coastaleng.2010.05.009>
- Chow, A. C. H., & Sun, J. (2022). Combining Sea Level Rise Inundation Impacts, Tidal Flooding and Extreme Wind Events along the Abu Dhabi Coastline. *Hydrology*, 9(8), Article 8. <https://doi.org/10.3390/hydrology9080143>
- Cooper, H. M., Chen, Q., Fletcher, C. H., & Barbee, M. M. (2012). Assessing vulnerability due to sea-level rise in Maui, Hawai'i using LiDAR remote sensing and GIS. *Climatic Change*, 116(3–4), 547–563. <https://doi.org/10.1007/s10584-012-0510-9>
- Cooper, H. M., Zhang, C., & Selch, D. (2015). Incorporating uncertainty of groundwater modeling in sea-level rise assessment: A case study in South Florida. *Climatic Change*, 129(1–2), 281–294. <https://doi.org/10.1007/s10584-015-1334-1>
- Cui, L., Ge, Z., Yuan, L., & Zhang, L. (2015). Vulnerability assessment of the coastal wetlands in the Yangtze Estuary, China to sea-level rise. *Estuarine, Coastal and Shelf Science*, 156, 42–51. <https://doi.org/10.1016/j.ecss.2014.06.015>
- Da Silva, F. P., Martins, J. R. S., & Nogueira, F. F. (2020). Impacts of Sea Level Rise on Seawater Intrusion in Cubatão River, Brazil. *Environmental Modeling & Assessment*, 25(6), 831–841. <https://doi.org/10.1007/s10666-020-09720-y>
- Dawod, G., & Hoda, F. M. (n.d.). Estimation of SLR hazardous impacts in Egypt within a GIS environment. *Uqu.Edu.Sa*. Retrieved September 18, 2023, from [https://www.academia.edu/794551/ESTIMATION\\_OF\\_SEA\\_LEVEL\\_RISE\\_HAZARDOUS\\_IMPACTS\\_IN\\_EGYPT\\_WITHIN\\_A\\_GIS\\_ENVIRONMENT](https://www.academia.edu/794551/ESTIMATION_OF_SEA_LEVEL_RISE_HAZARDOUS_IMPACTS_IN_EGYPT_WITHIN_A_GIS_ENVIRONMENT)
- Dawson, D., Shaw, J., & Roland Gehrels, W. (2016). Sea-level rise impacts on transport infrastructure: The notorious case of the coastal railway line at Dawlish, England. *Journal of Transport Geography*, 51, 97–109. <https://doi.org/10.1016/j.jtrangeo.2015.11.009>
- De Lellis, P., Ruiz Marín, M., & Porfiri, M. (2021). Modeling Human Migration Under Environmental Change: A Case Study of the Effect of Sea Level Rise in Bangladesh. *Earth's Future*, 9(4), e2020EF001931. <https://doi.org/10.1029/2020EF001931>
- De Lima, L. T., Fernández-Fernández, S., Weiss, C. V. C., Bitencourt, V., & Bernardes, C. (2021). Free and open-source software for Geographic Information System on coastal management: A study case of sea-level rise in southern Brazil. *Regional Studies in Marine Science*, 48, 102025. <https://doi.org/10.1016/j.rsma.2021.102025>
- Devoy, R. J. N. (2008). Coastal Vulnerability and the Implications of Sea-Level Rise for Ireland. *Journal of Coastal Research*, 242, 325–341. <https://doi.org/10.2112/07A-0007.1>
- Dhanalakshmi, S., Kankara, R. S., & Chenthamil Selvan, S. (n.d.). *Impact assessment of sea level rise over coastal landforms: A case study of Cuddalore coast, south-east coast of India—ProQuest*. Retrieved September 23, 2023, from <https://www.proquest.com/docview/2268137184?accountid=62373&parentSessionId=unqHyfAHp3gZtC8FjmhsX77qRy3G0MNCg1gLw9eAU%3D>
- Didier, D., Bandet, M., Bernatchez, P., & Dumont, D. (n.d.). *Modelling Coastal Flood Propagation under Sea Level Rise: A Case Study in Maria, Eastern Canada*. Retrieved September 24, 2023, from <https://www.mdpi.com/2076-3263/9/2/76>
- Dutta, D. (2011). An integrated tool for assessment of flood vulnerability of coastal cities to sea-level rise and potential socio-economic impacts: A case study in Bangkok, Thailand. *Hydrological Sciences Journal*, 56(5), 805–823. <https://doi.org/10.1080/02626667.2011.585611>
- Dwarakish, G. S., Vinay, S. A., Natesan, U., Asano, T., Kakinuma, T., Venkataramana, K., Pai, B. J., & Babita, M. K. (2009). Coastal vulnerability assessment of the future sea level rise in Udupi coastal zone of Karnataka state, west coast of India. *Ocean & Coastal Management*, 52(9), 467–478. <https://doi.org/10.1016/j.ocecoaman.2009.07.007>
- Ebert, K., Ekstedt, K., & Jarsjö, J. (2016). GIS analysis of effects of future Baltic sea level rise on the island of Gotland, Sweden. *Natural Hazards and Earth System Sciences*, 16(7), 1571–1582. <https://doi.org/10.5194/nhess-16-1571-2016>
- El Raey, M., Dewidar, K., & El Hattab, M. (1999). Adaptation to the impacts of sea level rise in Egypt. *Climate Research*, 12, 117–128. <https://doi.org/10.3354/cr012117>
- Elkabbany, M. F. (2019). *Sea Level Rise Vulnerability Assessment for Abu Dhabi, United Arab Emirates*.

- El-Raey, M. (1997). Vulnerability assessment of the coastal zone of the Nile delta of Egypt, to the impacts of sea level rise. *Ocean & Coastal Management*, 37(1), 29–40. [https://doi.org/10.1016/S0964-5691\(97\)00056-2](https://doi.org/10.1016/S0964-5691(97)00056-2)
- El-Raey, M., Fouda, Y., & Nasr, S. (1997). GIS assessment of the vulnerability of the Rosetta area, Egypt to impacts of sea rise. *Environmental Monitoring and Assessment*, 47(1), 59–77. <https://doi.org/10.1023/A:1005738302640>
- El-Raey, M., Frihy, O., Nasr, S. M., & Dewidar, Kh. (1999). Vulnerability Assessment of Sea Level Rise Over Port Said Governorate, Egypt. *Environmental Monitoring and Assessment*, 56(2), 113–128. <https://doi.org/10.1023/A:1005946819600>
- El-Raey, M., Nasr, S., Frihy, O., Desouki, S., & Dewidar, Kh. (1995). Potential Impacts of Accelerated Sea-Level Rise on Alexandria Governorate, Egypt. *Journal of Coastal Research*, 190–204.
- Enríquez, A. R., Marcos, M., Falqués, A., & Roelvink, D. (n.d.). *Assessing Beach and Dune Erosion and Vulnerability Under Sea Level Rise: A Case Study in the Mediterranean Sea*. Retrieved September 24, 2023, from <https://www.frontiersin.org/articles/10.3389/fmars.2019.00004/full>
- Fang, Y., Yin, J., & Wu, B. (2016). Flooding risk assessment of coastal tourist attractions affected by sea level rise and storm surge: A case study in Zhejiang Province, China. *Natural Hazards*, 84(1), 611–624. <https://doi.org/10.1007/s11069-016-2444-4>
- Faour, G., Fayad, A., & Mhawej, M. (2013). *GIS-Based Approach to the Assessment of Coastal Vulnerability to Sea Level Rise: Case Study on the Eastern Mediterranean*. [https://www.researchgate.net/profile/Ghaleb-Faour/publication/266558645\\_GIS-Based\\_Approach\\_to\\_the\\_Assessment\\_of\\_Coastal\\_Vulnerability\\_to\\_Sea\\_Level\\_Rise\\_Case\\_Study\\_on\\_the\\_Eastern\\_Mediterranean/links/543441c60cf294006f7352cf/GIS-Based-Approach-to-the-Assessment-of-Coastal-Vulnerability-to-Sea-Level-Rise-Case-Study-on-the-Eastern-Mediterranean.pdf](https://www.researchgate.net/profile/Ghaleb-Faour/publication/266558645_GIS-Based_Approach_to_the_Assessment_of_Coastal_Vulnerability_to_Sea_Level_Rise_Case_Study_on_the_Eastern_Mediterranean/links/543441c60cf294006f7352cf/GIS-Based-Approach-to-the-Assessment-of-Coastal-Vulnerability-to-Sea-Level-Rise-Case-Study-on-the-Eastern-Mediterranean.pdf)
- Fauzi, I., Radjawane, I. M., Latief, H., Ritonga, R. F., & Faizin, H. Y. (2021). Assessment of adaptive capacity to sea level rise using open-loop system, case study: Cirebon and Pangandaran. *IOP Conference Series. Earth and Environmental Science*, 708(1). <https://doi.org/10.1088/1755-1315/708/1/012104>
- Feagin, R. A., Sherman, D. J., & Grant, W. E. (2005). Coastal erosion, global sea-level rise, and the loss of sand dune plant habitats. *Frontiers in Ecology and the Environment*, 3(7), 359–364. [https://doi.org/10.1890/1540-9295\(2005\)003\[0359:CEGSRA\]2.0.CO;2](https://doi.org/10.1890/1540-9295(2005)003[0359:CEGSRA]2.0.CO;2)
- Feng, A., Gao, J., Wu, S., Liu, L., Li, Y., & Yue, X. (2018). Assessing the inundation risk resulting from extreme water levels under sea-level rise: A case study of Rongcheng, China. *Geomatics, Natural Hazards and Risk*, 9(1), 456–470. <https://doi.org/10.1080/19475705.2018.1447026>
- Feng, X., & Tsimplis, M. N. (2014). Sea level extremes at the coasts of China. *Journal of Geophysical Research: Oceans*, 119(3), 1593–1608. <https://doi.org/10.1002/2013JC009607>
- Fish, M. R., Côté, I. M., Horrocks, J. A., Mulligan, B., Watkinson, A. R., & Jones, A. P. (2008). Construction setback regulations and sea-level rise: Mitigating sea turtle nesting beach loss. *Ocean & Coastal Management*, 51(4), 330–341. <https://doi.org/10.1016/j.ocecoaman.2007.09.002>
- Fraile-Jurado, P., Álvarez-Francoso, J. I., Guisado-Pintado, E., Sánchez-Carnero, N., Ojeda-Zújar, J., & Leatherman, S. P. (2017). Mapping inundation probability due to increasing sea level rise along El Puerto de Santa María (SW Spain). *Natural Hazards*, 87(2), 581–598. <https://doi.org/10.1007/s11069-017-2782-x>
- Fraile-Jurado, P., Villarín, M. C., Leatherman, S. B., & Fernández-Díaz, M. (2021). Alternative approaches to medium-long term sea level rise mapping in Southern Miami Beach (Florida, USA). *Estuarine, Coastal and Shelf Science*, 255, 107365. <https://doi.org/10.1016/j.ecss.2021.107365>
- Frazier, T. G., Wood, N., Yarnal, B., & Bauer, D. H. (2010). Influence of potential sea level rise on societal vulnerability to hurricane storm-surge hazards, Sarasota County, Florida. *Applied Geography*, 30(4), 490–505. <https://doi.org/10.1016/j.apgeog.2010.05.005>
- Friedrich, E., & Kretzinger, D. (2012). Vulnerability of wastewater infrastructure of coastal cities to sea level rise: A South African case study. *Water SA*, 38(5), 755–764. <https://doi.org/10.4314/wsa.v38i5.15>
- Galgana, G., Abad, S., Villarin, J. R., & Vicente, M. C. (2004). Visualizing sea level rise in Navotas by GIS and terrain modelling. *Journal of Environmental Science and Management*, 7(1). <https://www.ukdr.uplb.edu.ph/journal-articles/5685>
- Gesch, D. B. (2009). Analysis of Lidar Elevation Data for Improved Identification and Delineation of Lands Vulnerable to Sea-Level Rise. *Journal of Coastal Research*. <https://meridian.allenpress.com/jcr/article-abstract/doi/10.2112/SI53-006.1/28399/Analysis-of-Lidar-Elevation-Data-for-Improved>
- Gesch, D. B. (2013). Consideration of Vertical Uncertainty in Elevation-Based Sea-Level Rise Assessments: Mobile Bay, Alabama Case Study. *Journal of Coastal Research*, 63, 197–210. <https://doi.org/10.2112/SI63-016.1>
- Ghosh, M. K., Kumar, L., & Kibet Langat, P. (2019). Geospatial modelling of the inundation levels in the Sundarbans mangrove forests due to the impact of sea level rise and identification of affected species and regions. *Geomatics, Natural Hazards and Risk*, 10(1), 1028–1046. <https://doi.org/10.1080/19475705.2018.1564373>

- Ghoussein, Y., Mhawej, M., Jaffal, A., Fadel, A., El Hourany, R., & Faour, G. (2018). Vulnerability assessment of the South-Lebanese coast: A GIS-based approach. *Ocean & Coastal Management*, 158, 56–63. <https://doi.org/10.1016/j.ocecoaman.2018.03.028>
- Gilman, E., Ellison, J., & Coleman, R. (2007). Assessment of Mangrove Response to Projected Relative Sea-Level Rise And Recent Historical Reconstruction of Shoreline Position. *Environmental Monitoring and Assessment*, 124(1–3), 105–130. <https://doi.org/10.1007/s10661-006-9212-y>
- Gracia, V., Sierra, J. P., Gómez, M., Pedrol, M., Sampé, S., García-León, M., & Gironella, X. (2019). Assessing the impact of sea level rise on port operability using LiDAR-derived digital elevation models. *Remote Sensing of Environment*, 232, 111318. <https://doi.org/10.1016/j.rse.2019.111318>
- Gravelle, G., & Mimura, N. (2008). Vulnerability assessment of sea-level rise in Viti Levu, Fiji Islands. *Sustainability Science*, 3(2), 171–180. <https://doi.org/10.1007/s11625-008-0052-2>
- Griggs, G. (2021). *Rising Seas in California—An Update on Sea-Level Rise Science* (pp. 105–111). [https://doi.org/10.1142/9789811213960\\_0016](https://doi.org/10.1142/9789811213960_0016)
- Hadipour, V., Vafaie, F., & Kerle, N. (2020). An indicator-based approach to assess social vulnerability of coastal areas to sea-level rise and flooding: A case study of Bandar Abbas city, Iran. *Ocean & Coastal Management*, 188, 105077. <https://doi.org/10.1016/j.ocecoaman.2019.105077>
- Hallegatte, S., Ranger, N., Mestre, O., Dumas, P., Corfee-Morlot, J., Herweijer, C., & Wood, R. M. (2011). Assessing climate change impacts, sea level rise and storm surge risk in port cities: A case study on Copenhagen. *Climatic Change*, 104(1), 113–137. <https://doi.org/10.1007/s10584-010-9978-3>
- Han, M., Hou, J., & Wu, L. (1995). Potential Impacts of Sea-Level Rise on China's Coastal Environment and Cities: A National Assessment. *Journal of Coastal Research*, 79–95.
- Hassaan, M. A. (2013). GIS-based risk assessment for the Nile Delta coastal zone under different sea level rise scenarios case study: Kafr EL Sheikh Governorate, Egypt. *Journal of Coastal Conservation*, 17(4), 743–754. <https://doi.org/10.1007/s11852-013-0273-0>
- Hastuti, A. W., Nagai, M., & Suniada, K. I. (2022). *Coastal Vulnerability Assessment of Bali Province, Indonesia Using Remote Sensing and GIS Approaches*. <https://www.mdpi.com/2072-4292/14/17/4409>
- Heberger, M., Cooley, H., Herrera, P., Gleick, P. H., & Moore, E. (n.d.). *The impacts of sea-level rise on the California coast*.
- Hennecke, W. G. (2004). GIS Modelling of Sea-Level Rise Induced Shoreline Changes Inside Coastal Re-Entrants—Two Examples from Southeastern Australia. *Natural Hazards*, 31(1), 253–276. <https://doi.org/10.1023/B:NHAZ.0000020262.46491.9>
- Hennecke, W. G., & Cowell, P. J. (2000). GIS Modeling of Impacts of an Accelerated Rate of Sea-Level Rise on Coastal Inlets and Deeply Embayed Shorelines. *Environmental Geosciences*, 7(3), 137–148. <https://doi.org/10.1046/j.1526-0984.2000.73002.x>
- Hennecke, W. G., Greve, C., Cowell, P. J., & Thom, B. G. (2004). GIS-Based Coastal Behavior Modeling and Simulation of Potential Land and Property Loss: Implications of Sea-Level Rise at Collaroy/Narrabeen Beach, Sydney (Australia). *Coastal Management*, 32(4), 449–470. <https://doi.org/10.1080/08920750490487485>
- Hereher, M. E. (2010). Vulnerability of the Nile Delta to sea level rise: An assessment using remote sensing. *Geomatics, Natural Hazards and Risk*, 1(4), 315–321. <https://doi.org/10.1080/19475705.2010.516912>
- Hil, G. (2020). Better Management Through Measurement: Integrating Archaeological Site Features into a GIS-Based Erosion and Sea Level Rise Impact Assessment—Blueskin Bay, New Zealand. *The Journal of Island and Coastal Archaeology*, 15(1), 104–126. <https://doi.org/10.1080/15564894.2018.1531331>
- Hong, B., Liu, Z., Shen, J., Wu, H., Gong, W., Xu, H., & Wang, D. (2020). Potential physical impacts of sea-level rise on the Pearl River Estuary, China. *Journal of Marine Systems*, 201, 103245. <https://doi.org/10.1016/j.jmarsys.2019.103245>
- Huang, Z., Zong, Y., & Zhang, W. (2004). Coastal Inundation due to Sea Level Rise in the Pearl River Delta, China. *Natural Hazards*, 33(2), 247–264. <https://doi.org/10.1023/B:NHAZ.0000037038.18814.b0>
- Isla, F., & Lamarchina, S. (2023). Beach-gravel armouring response to sea level rise: Case studies from Patagonia and Tierra del Fuego. *Journal of South American Earth Sciences*, 128, 104454. <https://doi.org/10.1016/j.jsames.2023.104454>
- Islam, Md. A., Hossain, Md. S., & Murshed, S. (2015). Assessment of Coastal Vulnerability Due to Sea Level Change at Bhola Island, Bangladesh: Using Geospatial Techniques. *Journal of the Indian Society of Remote Sensing*, 43(3), 625–637. <https://doi.org/10.1007/s12524-014-0426-0>
- Ismail, Yehia, & Morsy. (2016). Natural Resources Assessment and Sea Level Rise Impact Using GIS and RS for North Alexandria and Kafr El Dawar District, Egypt. *Alexandria Science Exchange Journal: An International Quarterly Journal of Science Agricultural Environments*, 37(October-December), 831–850. <https://doi.org/10.21608/asejaiqsae.2016.2650>
- Jana, A., Biswas, A., Maiti, S., & Bhattacharya, A. K. (2014). Shoreline changes in response to sea level rise along Digha Coast, Eastern India: An analytical approach of remote sensing, GIS and statistical techniques. *Journal of Coastal Conservation*, 18(3), 145–155. <https://doi.org/10.1007/s11852-013-0297-5>
- Jennath, A., Krishnan, A., Paul, S. K., & Bhaskaran, P. K. (2021). Climate projections of sea level rise and

- associated coastal inundation in atoll islands: Case of Lakshadweep Islands in the Arabian Sea. *Regional Studies in Marine Science*, 44, 101793. <https://doi.org/10.1016/j.rsma.2021.101793>
- Jiang, L., Gerkema, T., Idier, D., Slangen, A. B. A., & Soetaert, K. (2020). Effects of sea-level rise on tides and sediment dynamics in a Dutch tidal bay. *Ocean Science*, 16(2), 307–321. <https://doi.org/10.5194/os-16-307-2020>
- Johnson, C. S., Miller, K. G., Browning, J. V., Kopp, R. E., Khan, N. S., Fan, Y., Stanford, S. D., & Horton, B. P. (2018). The role of sediment compaction and groundwater withdrawal in local sea-level rise, Sandy Hook, New Jersey, USA. *Quaternary Science Reviews*, 181, 30–42. <https://doi.org/10.1016/j.quascirev.2017.11.031>
- Johnston, A., Slovinsky, P., & Yates, K. L. (2014). Assessing the vulnerability of coastal infrastructure to sea level rise using multi-criteria analysis in Scarborough, Maine (USA). *Ocean & Coastal Management*, 95, 176–188. <https://doi.org/10.1016/j.ocecoaman.2014.04.016>
- Joo, S.-M., & Kim, J.-H. (2021). The Effect of Sea Level Rise on Adjacent Land and the Resulting Land Value Assessment Method. *Journal of Coastal Research*, 114(1), 479–483. <https://doi.org/10.2112/JCR-S1114-097.1>
- Karim, M. F., & Mimura, N. (2008). Impacts of climate change and sea-level rise on cyclonic storm surge floods in Bangladesh. *Global Environmental Change*, 18(3), 490–500. <https://doi.org/10.1016/j.gloenvcha.2008.05.002>
- Kebede, A. S., Nicholls, R. J., Hanson, S., & Mokrech, M. (2012). Impacts of Climate Change and Sea-Level Rise: A Preliminary Case Study of Mombasa, Kenya. *Journal of Coastal Research*, 278, 8–19. <https://doi.org/10.2112/JCOASTRES-D-10-00069.1>
- Khan, A. S., Ramachandran, A., Usha, N., Punitha, S., & Selvam, V. (2012). Predicted impact of the sea-level rise at Vellar–Coleroon estuarine region of Tamil Nadu coast in India: Mainstreaming adaptation as a coastal zone management option. *Ocean & Coastal Management*, 69, 327–339. <https://doi.org/10.1016/j.ocecoaman.2012.08.005>
- Khang, N. D., Kotera, A., Sakamoto, T., & Yokozawa, M. (2008). Sensitivity of Salinity Intrusion to Sea Level Rise and River Flow Change in Vietnamese Mekong Delta-Impacts on Availability of Irrigation Water for Rice Cropping. *Journal of Agricultural Meteorology*, 64(3), 167–176. <https://doi.org/10.2480/agrmet.64.3.4>
- Kim, Y. H. (2020). Assessment of Coastal Inundation due to Storm Surge under Future Sea-Level Rise Conditions. *Journal of Coastal Research*, 95, 845–849. <https://doi.org/10.2112/SI95-164.1>
- Krien, Y., Dudon, B., Roger, J., Arnaud, G., & Zahibo, N. (2017). Assessing storm surge hazard and impact of sea level rise in the Lesser Antilles case study of Martinique. *Natural Hazards and Earth System Sciences*, 17(9), 1559–1571. <https://doi.org/10.5194/nhess-17-1559-2017>
- Kuleli, T. (2010). City-Based Risk Assessment of Sea Level Rise Using Topographic and Census Data for the Turkish Coastal Zone. *Estuaries and Coasts*, 33(3), 640–651. <https://doi.org/10.1007/s12237-009-9248-7>
- Kumar, M. (2015). Remote sensing and GIS based sea level rise inundation assessment of Bhitarkanika forest and adjacent eco-fragile area, Odisha. *International Journal of Geomatics and Geosciences*, 5(4), 674–686.
- Le, T. V. H., Nguyen, H. N., Wolanski, E., Tran, T. C., & Haruyama, S. (2007). The combined impact on the flooding in Vietnam's Mekong River delta of local man-made structures, sea level rise, and dams upstream in the river catchment. *Estuarine, Coastal and Shelf Science*, 71(1), 110–116. <https://doi.org/10.1016/j.ecss.2006.08.021>
- Lee, H. S., & Kaneko, A. (2015). Estimation and Projection of Non-Linear Relative Sea-Level Rise in the Seto Inland Sea, Japan. *Atmosphere-Ocean*, 53(4), 398–411. <https://doi.org/10.1080/07055900.2015.1069254>
- Lee, J. K., Park, R. A., & Mausel, P. W. (1992). Application of geoprocessing and simulation modeling to estimate impacts of sea level rise on the northeast coast of Florida. *Photogrammetric Engineering and Remote Sensing; (United States)*, 58:11. <https://www.osti.gov/biblio/6998564>
- Lee, Y. (2014). Coastal Planning Strategies for Adaptation to Sea Level Rise: A Case Study of Mokpo, Korea. *Journal of Building Construction and Planning Research*, 2014. <https://doi.org/10.4236/jbcpr.2014.21007>
- Li, S., Meng, X., Ge, Z., & Zhang, L. (2015). Vulnerability assessment of the coastal mangrove ecosystems in Guangxi, China, to sea-level rise. *Regional Environmental Change*, 15(2), 265–275. <https://doi.org/10.1007/s10113-014-0639-3>
- Li, Y., Jia, X., Liu, Z., Zhao, L., Sheng, P., & Storozum, M. J. (2022). The potential impact of rising sea levels on China's coastal cultural heritage: A GIS risk assessment. *Antiquity*, 96(386), 406–421. <https://doi.org/10.15184/aqy.2022.1>
- Liang, S., Hu, W., Liu, J., Su, S., Chen, G., Chen, S., Xie, B., Du, J., Liu, W., & Chen, B. (2023). Mapping mangrove sustainability in the face of sea level rise and land use: A case study on Leizhou Peninsula, China. *Journal of Environmental Management*, 325, 116554. <https://doi.org/10.1016/j.jenvman.2022.116554>
- Lichter, M., & Felsenstein, D. (2012). Assessing the costs of sea-level rise and extreme flooding at the local level: A GIS-based approach. *Ocean & Coastal Management*, 59, 47–62. <https://doi.org/10.1016/j.ocecoaman.2011.12.020>
- Lopes, C. L., Azevedo, A., & Dias, J. M. (2013). Flooding assessment under sea level rise scenarios: Ria de Aveiro case study. *Journal of Coastal Research*, 65, 766–771. <https://doi.org/10.2112/SI65-130.1>
- Lu, Q.-C., & Peng, Z.-R. (2011). Vulnerability Analysis of Transportation Network under Scenarios of Sea Level

- Rise. *Transportation Research Record*, 2263(1), 174–181. <https://doi.org/10.3141/2263-19>
- Mahapatra, M., Ramakrishnan, R., & Rajawat, A. S. (2015). Coastal vulnerability assessment of Gujarat coast to sea level rise using GIS techniques: A preliminary study. *Journal of Coastal Conservation*, 19(2), 241–256. <https://doi.org/10.1007/s11852-015-0384-x>
- Marfai, M. A. (2014). Impact of sea level rise to coastal ecology: A case study on the northern part of Java Island, Indonesia. *Quaestiones Geographicae*, 33(1), Article 1. <https://doi.org/10.2478/quageo-2014-0008>
- Marfai, M. A., & King, L. (2008). Potential vulnerability implications of coastal inundation due to sea level rise for the coastal zone of Semarang city, Indonesia. *Environmental Geology*, 54(6), 1235–1245. <https://doi.org/10.1007/s00254-007-0906-4>
- Mather, A. A., & Stretch, D. D. (2012). A Perspective on Sea Level Rise and Coastal Storm Surge from Southern and Eastern Africa: A Case Study Near Durban, South Africa. *Water*, 4(1), Article 1. <https://doi.org/10.3390/w4010237>
- Maulud, K. N. A., & Rafar, R. M. (2015). Determination the impact of sea level rise to shoreline changes using GIS. *2015 International Conference on Space Science and Communication (IconSpace)*, 352–357. <https://doi.org/10.1109/IconSpace.2015.7283798>
- Mazor, T., Runting, R. K., Saunders, M. I., Huang, D., Friess, D. A., Nguyen, N. T. H., Lowe, R. J., Gilmour, J. P., Todd, P. A., & Lovelock, C. E. (2021). Future-proofing conservation priorities for sea level rise in coastal urban ecosystems. *Biological Conservation*, 260, 109190. <https://doi.org/10.1016/j.biocon.2021.109190>
- McInnes, K. L., Walsh, K. J. E., Hubbert, G. D., & Beer, T. (2003). Impact of Sea-level Rise and Storm Surges on a Coastal Community. *Natural Hazards*, 30(2), 187–207. <https://doi.org/10.1023/A:1026118417752>
- Mehedi Hasan Saddam, Md., Hossain, K. T., Bhowmick, R. C., Salauddin, Md., & Aziz, T. (2023). Assessing the shoreline dynamics of Moheshkhali Island in Bangladesh by integrating GIS techniques and sea-level data. *Regional Studies in Marine Science*, 62, 102941. <https://doi.org/10.1016/j.rsma.2023.102941>
- Mehvar, S., Filatova, T., Syukri, I., Dastgheib, A., & Ranasinghe, R. (2018). Developing a framework to quantify potential Sea level rise-driven environmental losses: A case study in Semarang coastal area, Indonesia. *Environmental Science & Policy*, 89, 216–230. <https://doi.org/10.1016/j.envsci.2018.06.019>
- Meilianda, E., Pradhan, B., Syamsidik, Comfort, L. K., Alfian, D., Juanda, R., Syahreza, S., & Munadi, K. (2019). Assessment of post-tsunami disaster land use/land cover change and potential impact of future sea-level rise to low-lying coastal areas: A case study of Banda Aceh coast of Indonesia. *International Journal of Disaster Risk Reduction*, 41, 101292. <https://doi.org/10.1016/j.ijdr.2019.101292>
- Melo, W., Pinho, J., Iglesias, I., Bio, A., Avilez-Valente, P., Vieira, J., Bastos, L., & Veloso-Gomes, F. (2020). Hydro- and Morphodynamic Impacts of Sea Level Rise: The Minho Estuary Case Study. *Journal of Marine Science and Engineering*, 8(6), 441. <https://doi.org/10.3390/jmse8060441>
- Miller, K. G., Kopp, R. E., Horton, B. P., Browning, J. V., & Kemp, A. C. (2013). A geological perspective on sea-level rise and its impacts along the U.S. mid-Atlantic coast. *Earth's Future*, 1(1), 3–18. <https://doi.org/10.1002/2013EF000135>
- Miura, Y., Mandli, K. T., & Deodatis, G. (n.d.). *High-Speed GIS-Based Simulation of Storm Surge-Induced Flooding Accounting for Sea Level Rise | Natural Hazards Review | Vol 22, No 3*. Retrieved October 9, 2023, from [https://ascelibrary.org/doi/full/10.1061/\(ASCE\)NH.1527-6996.0000465](https://ascelibrary.org/doi/full/10.1061/(ASCE)NH.1527-6996.0000465)
- Mount, J., & Twiss, R. (2005). Subsidence, Sea Level Rise, and Seismicity in the Sacramento–San Joaquin Delta. *San Francisco Estuary and Watershed Science*, 3(1). <https://doi.org/10.15447/sfews.2005v3iss1art7>
- Murali, R. M., & Kumar, P. D. (2015). Implications of sea level rise scenarios on land use /land cover classes of the coastal zones of Cochin, India. *Journal of Environmental Management*, 148, 124–133. <https://doi.org/10.1016/j.jenvman.2014.06.010>
- Musa, M. S., Din, A. H. M., Zulkifli, N. A., Hamden, M. H., Rasib, A. W., & Khalid, N. F. (2023). Coastal Inundation Simulation due to Sea Level Rise in Terengganu, Malaysia. *The International Archives of the Photogrammetry, Remote Sensing and Spatial Information Sciences*, XLVIII-4-W6-2022, 261–267. <https://doi.org/10.5194/isprs-archives-XLVIII-4-W6-2022-261-2023>
- Musa, Z. N., Popescu, I., & Mynett, A. (2014). The Niger Delta's vulnerability to river floods due to sea level rise. *Natural Hazards and Earth System Sciences*, 14(12), 3317–3329. <https://doi.org/10.5194/nhess-14-3317-2014>
- Mussi, C. S., Bonetti, J., & Sperb, R. M. (2018). Coastal sensitivity and population exposure to sea level rise: A case study on Santa Catarina Island, Brazil. *Journal of Coastal Conservation*, 22(6), 1117–1128. <https://doi.org/10.1007/s11852-018-0619-8>
- Nageswara Rao, K., Subraelu, P., Venkateswara Rao, T., Hema Malini, B., Ratheesh, R., Bhattacharya, S., Rajawat, A. S., & Ajai. (2008). Sea-level rise and coastal vulnerability: An assessment of Andhra Pradesh coast, India through remote sensing and GIS. *Journal of Coastal Conservation*, 12(4), 195–207. <https://doi.org/10.1007/s11852-009-0042-2>
- Nettleman, C. A., Abd-Elrahman, A., Adams, D., Fik, T., Ruppert, T., Barnes, G., & Dewitt, B. (2016). A GIS based model of rolling easement policies in Pinellas County and Sarasota County, Florida. *Ocean & Coastal Management*, 132, 143–154. <https://doi.org/10.1016/j.ocecoaman.2016.08.020>
- Neumann, J. E., Hudgens, D. E., Herter, J., & Martinich, J. (2010). Assessing Sea-Level Rise Impacts: A GIS-Based Framework and Application to Coastal New Jersey.

- Coastal Management*, 38(4), 433–455. <https://doi.org/10.1080/08920753.2010.496105>
- Nidhinarangkoon, P., & Ritphring, S. (2019). Assessment of coastal vulnerability to sea level rise: A case study of Prachuap Khiri Khan, Thailand. *IOP Conference Series. Earth and Environmental Science*, 326(1). <https://doi.org/10.1088/1755-1315/326/1/012005>
- O'Grady, J. G., McInnes, K. L., Hemer, M. A., Hoeke, R. K., Stephenson, A. G., & Colberg, F. (2019). Extreme Water Levels for Australian Beaches Using Empirical Equations for Shoreline Wave Setup. *Journal of Geophysical Research: Oceans*, 124(8), 5468–5484. <https://doi.org/10.1029/2018JC014871>
- Onwuteaka, J. (2014). *GIS Modeling of Flooding Exposure in Nigerian Coastal Areas from Sea Level Rise. 4*.
- Oswald, M. R., & Treat, C. (2013). Identifying Sea Level Rise Vulnerability using GIS: Development of a Transit Inundation Modeling Method. *International Journal of Geoinformatics*. <https://journals.sfu.ca/ijg/index.php/journal/article/view/64>
- Özyurt, G., & Ergin, A. (2010). Improving Coastal Vulnerability Assessments to Sea-Level Rise: A New Indicator-Based Methodology for Decision Makers. *Journal of Coastal Research*, 26(2), 265–273.
- Papakonstantinou, I., Siwe, A. T., & Madanat, S. M. (2020). Effects of sea level rise induced land use changes on traffic congestion. *Transportation Research Part D: Transport and Environment*, 87, 102515. <https://doi.org/10.1016/j.trd.2020.102515>
- Paprotny, D., & Terefenko, P. (2017). New estimates of potential impacts of sea level rise and coastal floods in Poland. *Natural Hazards*, 85(2), 1249–1277. <https://doi.org/10.1007/s11069-016-2619-z>
- Pelling, H. E., Uehara, K., & Green, J. a. M. (2013). The impact of rapid coastline changes and sea level rise on the tides in the Bohai Sea, China. *Journal of Geophysical Research: Oceans*, 118(7), 3462–3472. <https://doi.org/10.1002/jgrc.20258>
- Poulter, B., & Halpin, P. N. (2008). Raster modelling of coastal flooding from sea-level rise. *International Journal of Geographical Information Science*, 22(2), 167–182. <https://doi.org/10.1080/13658810701371858>
- Pramanik, M. K. (2014). *Assessment the Impact of Sea Level Rise on Mangrove Dynamics of Ganges Delta in India using Remote Sensing and GIS*.
- Pramanik, M. K., Biswas, S. S., Mondal, B., & Pal, R. (2016). Coastal vulnerability assessment of the predicted sea level rise in the coastal zone of Krishna–Godavari delta region, Andhra Pradesh, east coast of India. *Environment, Development and Sustainability*, 18(6), 1635–1655. <https://doi.org/10.1007/s10668-015-9708-0>
- Prasita, V. D., & Kisnarti, E. A. (n.d.). *Prediction Of Sea Level Rise Impacts On The Coastal Areas Of Surabaya Using GIS*.
- Price, S. F., Payne, A. J., Howat, I. M., & Smith, B. E. (2011). Committed sea-level rise for the next century from Greenland ice sheet dynamics during the past decade. *Proceedings of the National Academy of Sciences*, 108(22), 8978–8983. <https://doi.org/10.1073/pnas.1017313108>
- Revell, D. L., Battalio, R., Spear, B., Ruggiero, P., & Vandever, J. (2011). A methodology for predicting future coastal hazards due to sea-level rise on the California Coast. *Climatic Change*, 109(S1), 251–276. <https://doi.org/10.1007/s10584-011-0315-2>
- Reyes, S. R., & Blanco, A. C. (2011). Assessment of coastal vulnerability to sea level rise using remote sensing (rs) and geographic information systems (gis): A case study of bolinao, pangasinan, philippines. In *Asian and Pacific Coasts 2011* (pp. 377–384). WORLD SCIENTIFIC. [https://doi.org/10.1142/9789814366489\\_0043](https://doi.org/10.1142/9789814366489_0043)
- Rocha, C., Antunes, C., & Catita, C. (n.d.). *Coastal Vulnerability Assessment Due to Sea Level Rise: The Case Study of the Atlantic Coast of Mainland Portugal | EndNote Click*. Retrieved September 24, 2023, from <https://click.endnote.com/viewer?doi=10.3390%2Fw12020360&token=WzM5NjE4NzcsjEwLjMzOTAvdzEyMDIwMzYwIl0.lhMxrBcQUg2ds8oVVbuy2B7W4BQ>
- Rotzoll, K., & Fletcher, C. H. (2013). Assessment of groundwater inundation as a consequence of sea-level rise. *Nature Climate Change*, 3(5), 477–481. <https://doi.org/10.1038/nclimate1725>
- Sagoe-Addy, K., & Appeaning Addo, K. (2013). Effect of predicted sea level rise on tourism facilities along Ghana's Accra coast. *Journal of Coastal Conservation*, 17(1), 155–166. <https://doi.org/10.1007/s11852-012-0227-y>
- Sahin, O., Stewart, R. A., Faivre, G., Ware, D., Tomlinson, R., & Mackey, B. (2019). Spatial Bayesian Network for predicting sea level rise induced coastal erosion in a small Pacific Island. *Journal of Environmental Management*, 238, 341–351. <https://doi.org/10.1016/j.jenvman.2019.03.008>
- Sallenger, A. H., Doran, K. S., & Howd, P. A. (2012). Hotspot of accelerated sea-level rise on the Atlantic coast of North America. *Nature Climate Change*, 2(12), 884–888. <https://doi.org/10.1038/nclimate1597>
- Scardino, G., Link to external site, this link will open in a new window, Anzidei, M., Link to external site, this link will open in a new window, Petio, P., Link to external site, this link will open in a new window, Serpelloni, E., Link to external site, this link will open in a new window, De Santis, V., Rizzo, A., Link to external site, this link will open in a new window, Liso, S. I., Zingaro, M., Link to external site, this link will open in a new window, Capolongo, D., Link to external site, this link will open in a new window, Vecchio, A., Link to external site, this link will open in a new window, Refice, A., ... Link to external site, this link will open in a new window. (2022). The Impact of Future Sea-Level Rise on Low-Lying Subsiding Coasts: A Case Study of Tavoliere

- Delle Puglie (Southern Italy). *Remote Sensing*, 14(19), 4936. <https://doi.org/10.3390/rs14194936>
- Scardino, G., Sabatier, F., Scicchitano, G., Piscitelli, A., Milella, M., Vecchio, A., Anzidei, M., & Mastronuzzi, G. (2020). Sea-Level Rise and Shoreline Changes Along an Open Sandy Coast: Case Study of Gulf of Taranto, Italy. *Water*, 12(5), 1414. <https://doi.org/10.3390/w12051414>
- Schaefer, N., Mayer-Pinto, M., Griffin, K. J., Johnston, E. L., Glamore, W., & Dafforn, K. A. (2020). Predicting the impact of sea-level rise on intertidal rocky shores with remote sensing. *Journal of Environmental Management*, 261, 110203. <https://doi.org/10.1016/j.jenvman.2020.110203>
- Schmidt-Thomé, P. (Ed.). (2006). *Sea level change affecting the spatial development of the Baltic Sea Region: A collection of peer reviewed articles on the results of the INTERREG IIIB Baltic Sea Region (BSR) project "Sea level change affecting the spatial development of the Baltic Sea Region - SEAREG."* Geological Survey of Finland.
- Sejati, A. W., & Buchori, I. (2010). A GIS Model for Predicting Disaster Prone Areas Affected by Global Sea-Level Rise: A Case Study of Semarang City. *ICRD Proceeding*. ICRD 2010. <http://eprints.undip.ac.id/48470/>
- Sharples, C. (n.d.). *Indicative mapping of Tasmanian coastal geomorphic vulnerability to sea-level rise using GIS line map of coastal geomorphic attributes*.
- Sheik Mujabar, P., & Chandrasekar, N. (2013). Coastal erosion hazard and vulnerability assessment for southern coastal Tamil Nadu of India by using remote sensing and GIS. *Natural Hazards*, 69(3), 1295–1314. <https://doi.org/10.1007/s11069-011-9962-x>
- Shepard, C. C., Agostini, V. N., Gilmer, B., Allen, T., Stone, J., Brooks, W., & Beck, M. W. (2012). Assessing future risk: Quantifying the effects of sea level rise on storm surge risk for the southern shores of Long Island, New York. *Natural Hazards*, 60(2), 727–745. <https://doi.org/10.1007/s11069-011-0046-8>
- Snoussi, M., Niazi, S., Khouakhi, A., & Raji, O. (n.d.). *Climate change and sea-level rise: A GIS-based vulnerability and impact assessment, the case of the Moroccan Coast*.
- Snoussi, M., Ouchani, T., Khouakhi, A., & Niang-Diop, I. (2009). Impacts of sea-level rise on the Moroccan coastal zone: Quantifying coastal erosion and flooding in the Tangier Bay. *Geomorphology*, 107(1), 32–40. <https://doi.org/10.1016/j.geomorph.2006.07.043>
- Snoussi, M., Ouchani, T., & Niazi, S. (2008). Vulnerability assessment of the impact of sea-level rise and flooding on the Moroccan coast: The case of the Mediterranean eastern zone. *Estuarine, Coastal and Shelf Science*, 77(2), 206–213. <https://doi.org/10.1016/j.ecss.2007.09.024>
- Stafford, S., & Abramowitz, J. (2017). An analysis of methods for identifying social vulnerability to climate change and sea level rise: A case study of Hampton Roads, Virginia. *Natural Hazards*, 85(2), 1089–1117. <https://doi.org/10.1007/s11069-016-2622-4>
- Stanchev, H., Palazov, A., & Stancheva, M. (2009). 3D GIS Model for Flood Risk Assessment of Varna Bay Due to Extreme Sea Level Rise. *Journal of Coastal Research*, 56.
- Sterr, H. (2008). Assessment of Vulnerability and Adaptation to Sea-Level Rise for the Coastal Zone of Germany. *Journal of Coastal Research*, 24(2 (242)), 380–393. <https://doi.org/10.2112/07A-0011.1>
- Stralberg, D., Brennan, M., Callaway, J. C., Wood, J. K., Schile, L. M., Jongsomjit, D., Kelly, M., Parker, V. T., & Crooks, S. (2011). Evaluating Tidal Marsh Sustainability in the Face of Sea-Level Rise: A Hybrid Modeling Approach Applied to San Francisco Bay. *PLOS ONE*, 6(11), e27388. <https://doi.org/10.1371/journal.pone.0027388>
- Subraelu, P. (2022). *Global Warming Climate Change and Sea Level Rise: Impact on Land Use Land Cover Features along UAE coast through Remote Sensing and GIS*. 12(5).
- Subraelu, P., Yagoub, M. M., Sefelnasr, A., Rao, K. N., & Ebraheem, A. (2021). *Sea-level Rise and Coastal Vulnerability: A Preliminary Assessment of UAE Coast through Remote Sensing and GIS*.
- Suganya, Vijaya Sarathy, Jose Ravindra Raj, Rajamanickam, & Anandaraju. (2015). *Assessing Coastal Vulnerability to Sea-Level Rise between Gopalpur and Puri, Odisha Coast of India, using Remote Sensing and GIS*.
- Suh, S.-W., & Kim, H.-J. (2020). Extreme Surge Heights Incorporating Long-term Tidal Variation and Sea-level Rise. *Journal of Coastal Research*, 95(SI), 1542–1546. <https://doi.org/10.2112/SI95-297.1>
- Suroso, D. S. A., & Firman, T. (2018). The role of spatial planning in reducing exposure towards impacts of global sea level rise case study: Northern coast of Java, Indonesia. *Ocean & Coastal Management*, 153, 84–97. <https://doi.org/10.1016/j.ocecoaman.2017.12.007>
- Tanavud, C., & Pramojanee. (1999). *Mangrove Habitat Dynamics and Sea-level Change*. [https://www.jstage.jst.go.jp/article/tropics/8/3/8\\_3\\_179/\\_article](https://www.jstage.jst.go.jp/article/tropics/8/3/8_3_179/_article)
- Tang, H. S., Kraatz, S., Qu, K., Chen, G. Q., Aboobaker, N., & Jiang, C. B. (2014). High-resolution survey of tidal energy towards power generation and influence of sea-level-rise: A case study at coast of New Jersey, USA. *Renewable and Sustainable Energy Reviews*, 32, 960–982. <https://doi.org/10.1016/j.rser.2013.12.041>
- Tang, W., Hearne, H. S., Slocum, Z., & Chen, T. (2023). GIS-Based Scientific Workflows for Automated Spatially Driven Sea Level Rise Modeling. *Sustainability*, 15(17), Article 17. <https://doi.org/10.3390/su151712704>
- Tate, C., & Frazier, T. (2013). A GIS Methodology to Assess Exposure of Coastal Infrastructure to Storm Surge & Sea-Level Rise: A Case Study of Sarasota County, Florida. *Journal of Geography & Natural Disasters*, 03(01). <https://doi.org/10.4172/2167-0587.S1-001>
- Tian, B., Zhang, L., Wang, X., Zhou, Y., & Zhang, W. (2010). Forecasting the effects of sea-level rise at Chongming Dongtan Nature Reserve in the Yangtze Delta,



- Shanghai, China. *Ecological Engineering*, 36(10), 1383–1388. <https://doi.org/10.1016/j.ecoleng.2010.06.016>
- Trace-Kleeberg, S., Haigh, I. D., Walraven, M., & Gourvenec, S. (2023). How should storm surge barrier maintenance strategies be changed in light of sea-level rise? A case study. *Coastal Engineering*, 184, 104336. <https://doi.org/10.1016/j.coastaleng.2023.104336>
- Vázquez Pinillos, F. J., & Marchena Gómez, M. J. (2021). Territorial impacts of sea-level rise in marsh environments. The case of the Bay of Cádiz, Spain. *Cuadernos de Investigación Geográfica*, 47(2), 523–543. <https://doi.org/10.18172/cig.4531>
- Wang, F., Li, J., Shi, P., Shang, Z., Li, Y., & Wang, H. (2019). The impact of sea-level rise on the coast of Tianjin-Hebei, China. *China Geology*, 2(1), 26–39. <https://doi.org/10.31035/cg2018061>
- Wang, G., Wang, M., Lu, X., & Jiang, M. (2016). Surface elevation change and susceptibility of coastal wetlands to sea level rise in Liaohé Delta, China. *Estuarine, Coastal and Shelf Science*, 180, 204–211. <https://doi.org/10.1016/j.ecss.2016.07.011>
- Wang, H., Ge, Z., Yuan, L., & Zhang, L. (2014). Evaluation of the combined threat from sea-level rise and sedimentation reduction to the coastal wetlands in the Yangtze Estuary, China. *Ecological Engineering*, 71, 346–354. <https://doi.org/10.1016/j.ecoleng.2014.07.058>
- Wang, J., Gao, W., Xu, S., & Yu, L. (2012). Evaluation of the combined risk of sea level rise, land subsidence, and storm surges on the coastal areas of Shanghai, China. *Climatic Change*, 115(3), 537–558. <https://doi.org/10.1007/s10584-012-0468-7>
- Wang, Y. (1998). Sea-Level Changes, Human Impacts and Coastal Responses in China. *Journal of Coastal Research*, 14(1), 31–36.
- Wang, Z., Zhan, Q., Long, H., Saito, Y., Gao, X., Wu, X., & Zhao, Y. (2013). *Early to mid-Holocene rapid sea-level rise and coastal response on the southern Yangtze delta plain, China—WANG - 2013—Journal of Quaternary Science—Wiley Online Library*. <https://onlinelibrary.wiley.com/doi/full/10.1002/jqs.2662>
- Wassmann, R., Hien, N. X., Hoanh, C. T., & Tuong, T. P. (2004). Sea Level Rise Affecting the Vietnamese Mekong Delta: Water Elevation in the Flood Season and Implications for Rice Production. *Climatic Change*, 66(1), 89–107. <https://doi.org/10.1023/B:CLIM.0000043144.69736.b7>
- Watson, P. J. (2019). Updated Mean Sea-Level Analysis: South Korea. *Journal of Coastal Research*, 35(2), 241–250. <https://doi.org/10.2112/JCOASTRES-D-18-00138.1>
- Webster, T. L., Forbes, D. L., MacKinnon, E., & Roberts, D. (2006). Flood-risk mapping for storm-surge events and sea-level rise using lidar for southeast New Brunswick. *Canadian Journal of Remote Sensing*, 32(2), 194–211. <https://doi.org/10.5589/m06-016>
- Weiss, J. L., Overpeck, J. T., & Strauss, B. (2011). *Implications of recent sea level rise science for low-elevation areas in coastal cities of the conterminous U.S.A.* | SpringerLink. <https://link.springer.com/article/10.1007/s10584-011-0024-x>
- Wu, S.-Y., Yarnal, B., & Fisher, A. (2002). Vulnerability of coastal communities to sea-level rise: A case study of Cape May County, New Jersey, USA. *Climate Research*, 22(3), 255–270. <https://doi.org/10.3354/cr022255>
- Wu, W., Biber, P., & Bethel, M. (2017). Thresholds of sea-level rise rate and sea-level rise acceleration rate in a vulnerable coastal wetland. *Ecology and Evolution*, 7(24), 10890–10903. <https://doi.org/10.1002/ece3.3550>
- Xie, W., Tang, B., & Meng, Q. (2022). The Impact of Sea-Level Rise on Urban Properties in Tampa Due to Climate Change. *Water*, 14(1), Article 1. <https://doi.org/10.3390/w14010013>
- Yanli, T. (n.d.). *The Application of GIS and RS for Coastline Change Detection and Risk Assessment to Enhanced Sea Level Rise*.
- Yin, J., Xu, S., Wang, J., Zhong, H., Hu, Y., Yin, Z., Wang, K., & Zhang, X. (2010). Vulnerability assessment of combined impacts of sea level rise and coastal flooding for China's coastal region using remote sensing and GIS. *2010 18th International Conference on Geoinformatics*, 1–4. <https://doi.org/10.1109/GEOINFORMATICS.2010.5567562>
- Yin, J., Yin, Z., Hu, X., Xu, S., Wang, J., Li, Z., Zhong, H., & Gan, F. (2011). Multiple scenario analyses forecasting the confounding impacts of sea level rise and tides from storm induced coastal flooding in the city of Shanghai, China. *Environmental Earth Sciences*, 63(2), 407–414. <https://doi.org/10.1007/s12665-010-0787-9>
- Yin, J., Yin, Z., Wang, J., & Xu, S. (2012). National assessment of coastal vulnerability to sea-level rise for the Chinese coast. *Journal of Coastal Conservation*, 16(1), 123–133. <https://doi.org/10.1007/s11852-012-0180-9>
- Yin, J., Yu, D., Yin, Z., Wang, J., & Xu, S. (2013). Modelling the combined impacts of sea-level rise and land subsidence on storm tides induced flooding of the Huangpu River in Shanghai, China. *Climatic Change*, 119(3–4), 919–932. <https://doi.org/10.1007/s10584-013-0749-9>
- Yusuf, J.-E., Rawat, P., Considine, C., Covi, M., St. John, B., Nicula, J. G., & Anuar, K. A. (2018). Participatory GIS as a Tool for Stakeholder Engagement in Building Resilience to Sea Level Rise: A Demonstration Project. *Marine Technology Society Journal*, 52(2), 45–55. <https://doi.org/10.4031/MTSJ.52.2.12>
- Zhang, K. (2011). Analysis of non-linear inundation from sea-level rise using LIDAR data: A case study for South Florida. *Climatic Change*, 106(4), 537–565. <https://doi.org/10.1007/s10584-010-9987-2>

- Zhang, K., Dittmar, J., Ross, M., & Bergh, C. (2011). Assessment of sea level rise impacts on human population and real property in the Florida Keys. *Climatic Change*, 107(1–2), 129–146. <https://doi.org/10.1007/s10584-011-0080-2>
- Zhang, R., Dai, J., Bai, Y., Barone, D., & Hill-Beaton, L. (2023). Risk-based transportation infrastructure management: An integrated framework and case study in USVI against coastal flood and sea level rise. *Ocean & Coastal Management*, 242, 106723. <https://doi.org/10.1016/j.ocecoaman.2023.106723>
- Zhou, Y., Ni, Z., Vetter, P. A., Xu, H., Hong, B., Wang, H., Li, W., & Liu, S. (2022). Model Simulation of Storm Surge in the Northwestern South China Sea Under the Impact of Sea Level Rise: A Case Study of Super Typhoon Rammasun (2014). *Frontiers in Marine Science*, 9. <https://www.frontiersin.org/articles/10.3389/fmars.2022.878301>
